# Supplementary material for: Hg2(SeO3)(SO4): the first sulfate selenite with large birefringence explored from d10transition metal compounds
Source: Royal Society of Chemistry journal article supplement (doi:10.1039/d2qm00773h), 2022-01-01
Supplement: d2qm00773h1.pdf [file d2qm00773h1.pdf]

## Hg<sub>2</sub>(SeO<sub>3</sub>)(SO<sub>4</sub>): The First Sulfate Selenite with Large Birefringence

### Explored from d<sup>10</sup> Transition Metal Compounds

Peng-Fei Li<sup>a,b</sup>, Chun-Li Hu<sup>a</sup>, Fang Kong<sup>\*,a,b</sup>, Jiang-Gao Mao<sup>a</sup>

<sup>a</sup> State Key Laboratory of Structural Chemistry, Fujian Institute of Research on the Structure of Matter, Chinese Academy of Sciences, Fuzhou 350002, P. R. China.

<sup>b</sup> University of Chinese Academy of Sciences, Beijing 100049, P. R. China.

E-mail: [kongfang@fjirsm.ac.cn](mailto:kongfang@fjirsm.ac.cn)

### Supporting Information

|                                                                                                                                                                                                                                                                                                                                                                                                           |    |
|-----------------------------------------------------------------------------------------------------------------------------------------------------------------------------------------------------------------------------------------------------------------------------------------------------------------------------------------------------------------------------------------------------------|----|
| <b>Table S1.</b> Calculated bond valences for the three compounds.....                                                                                                                                                                                                                                                                                                                                    | 1  |
| <b>Table S2.</b> State energies (eV) of the lowest conduction band (L-CB) and the highest valence band (H-VB) of the three compounds.....                                                                                                                                                                                                                                                                 | 5  |
| <b>Computational Method</b> .....                                                                                                                                                                                                                                                                                                                                                                         | 6  |
| <b>Figure S1.</b> Simulated and experimental powder X-ray diffractometer patterns of Hg <sub>2</sub> (SeO <sub>3</sub> )(SO <sub>4</sub> ) (a), La <sub>2</sub> Hg <sub>3</sub> (SeO <sub>3</sub> ) <sub>4</sub> (SO <sub>4</sub> ) <sub>2</sub> (H <sub>2</sub> O) <sub>2</sub> (b) and Ag <sub>2</sub> Cd(Se <sub>2</sub> O <sub>5</sub> )(Se <sub>0.3</sub> S <sub>0.7</sub> O <sub>4</sub> ) (c)..... | 8  |
| <b>Figure S2.</b> IR spectra of Hg <sub>2</sub> (SeO <sub>3</sub> )(SO <sub>4</sub> ) (a), La <sub>2</sub> Hg <sub>3</sub> (SeO <sub>3</sub> ) <sub>4</sub> (SO <sub>4</sub> ) <sub>2</sub> (H <sub>2</sub> O) <sub>2</sub> (b) and Ag <sub>2</sub> Cd(Se <sub>2</sub> O <sub>5</sub> )(Se <sub>0.3</sub> S <sub>0.7</sub> O <sub>4</sub> ) (c).....                                                      | 9  |
| <b>Figure S3.</b> Calculated refractive indices and birefringence of La <sub>2</sub> Hg <sub>3</sub> (SeO <sub>3</sub> ) <sub>4</sub> (SO <sub>4</sub> ) <sub>2</sub> (H <sub>2</sub> O) <sub>2</sub> (a) and Ag <sub>2</sub> Cd(Se <sub>2</sub> O <sub>5</sub> )(Se <sub>0.3</sub> S <sub>0.7</sub> O <sub>4</sub> ) (b).....                                                                            | 10 |
| <b>Figure S4.</b> 2D mercuric selenite layer (a), coordination environment of Se(1)O <sub>3</sub> group (b) and coordination environment of SO <sub>4</sub> (c) in Hg <sub>2</sub> (SeO <sub>3</sub> )(SO <sub>4</sub> ).....                                                                                                                                                                             | 12 |
| <b>Figure S5.</b> 2D mercury oxide layer of Hg <sub>2</sub> (SeO <sub>3</sub> )(SO <sub>4</sub> ).....                                                                                                                                                                                                                                                                                                    | 12 |
| <b>Figure S6.</b> The coordination environment of SeO <sub>3</sub> group (a) and SO <sub>4</sub> tetrahedrons (b) in La <sub>2</sub> Hg <sub>3</sub> (SeO <sub>3</sub> ) <sub>4</sub> (SO <sub>4</sub> ) <sub>2</sub> (H <sub>2</sub> O) <sub>2</sub> .....                                                                                                                                               | 13 |
| <b>Figure S7.</b> The [Cd <sub>2</sub> O <sub>10</sub> ] dimers (a), coordination environment of Se <sub>2</sub> O <sub>5</sub> group (b) and coordination environment of SSeO <sub>4</sub> (c) in Ag <sub>2</sub> Cd(Se <sub>2</sub> O <sub>5</sub> )(Se <sub>0.3</sub> S <sub>0.7</sub> O <sub>4</sub> ).....                                                                                           | 14 |
| <b>References</b> .....                                                                                                                                                                                                                                                                                                                                                                                   | 15 |

**Table S1.** Calculated bond valences for the three compounds.

| Compound                                                                                                                         | Bond          | Bond     | Bond-valence | BVS   |
|----------------------------------------------------------------------------------------------------------------------------------|---------------|----------|--------------|-------|
|                                                                                                                                  |               | lengths  |              |       |
| Hg <sub>2</sub> (SeO <sub>3</sub> )(SO <sub>4</sub> )                                                                            | Se(1)-O(1)    | 1.715(7) | 1.296        | 3.788 |
|                                                                                                                                  | Se(1)-O(2)#1  | 1.749(7) | 1.182        |       |
|                                                                                                                                  | Se(1)-O(3)    | 1.711(8) | 1.310        |       |
|                                                                                                                                  | S(1)-O(4)     | 1.459(8) | 1.526        | 6.107 |
|                                                                                                                                  | S(1)-O(5)     | 1.489(8) | 1.440        |       |
|                                                                                                                                  | S(1)-O(6)     | 1.475(7) | 1.496        |       |
|                                                                                                                                  | S(1)-O(7)#2   | 1.448(8) | 1.609        |       |
|                                                                                                                                  | Hg(1)-O(1)    | 2.176(7) | 0.514        | 1.681 |
|                                                                                                                                  | Hg(1)-O(2)    | 2.249(7) | 0.422        |       |
|                                                                                                                                  | Hg(1)-O(3)#3  | 2.549(8) | 0.188        |       |
|                                                                                                                                  | Hg(1)-O(4)#4  | 2.560(8) | 0.182        |       |
|                                                                                                                                  | Hg(1)-O(4)    | 2.678(8) | 0.132        |       |
|                                                                                                                                  | Hg(1)-O(5)#5  | 2.453(8) | 0.243        |       |
|                                                                                                                                  | Hg(2)-O(1)#6  | 2.375(7) | 0.300        |       |
|                                                                                                                                  | Hg(2)-O(2)#7  | 2.225(7) | 0.451        | 1.817 |
|                                                                                                                                  | Hg(2)-O(3)    | 2.194(7) | 0.490        |       |
|                                                                                                                                  | Hg(2)-O(6)    | 2.381(8) | 0.296        |       |
|                                                                                                                                  | Hg(2)-O(7)#7  | 2.401(8) | 0.280        |       |
| La <sub>2</sub> Hg <sub>3</sub> (SeO <sub>3</sub> ) <sub>4</sub> (SO <sub>4</sub> ) <sub>2</sub> (H <sub>2</sub> O) <sub>2</sub> | Se(1)-O(1)    | 1.677(7) | 1.436        | 4.002 |
|                                                                                                                                  | Se(1)-O(2)    | 1.708(7) | 1.321        |       |
|                                                                                                                                  | Se(1)-O(3)    | 1.730(7) | 1.245        |       |
|                                                                                                                                  | Se(2)-O(4)    | 1.729(7) | 1.248        | 3.985 |
|                                                                                                                                  | Se(2)-O(5)    | 1.723(7) | 1.269        |       |
|                                                                                                                                  | Se(2)-O(6)    | 1.669(7) | 1.468        |       |
|                                                                                                                                  | Se(3)-O(7)    | 1.707(7) | 1.325        | 4.125 |
|                                                                                                                                  | Se(3)-O(8)    | 1.688(8) | 1.394        |       |
|                                                                                                                                  | Se(3)-O(9)    | 1.685(7) | 1.406        |       |
|                                                                                                                                  | Se(4)-O(10)   | 1.730(7) | 1.245        | 4.012 |
|                                                                                                                                  | Se(4)-O(11)   | 1.697(9) | 1.361        |       |
|                                                                                                                                  | Se(4)-O(12)   | 1.685(8) | 1.406        |       |
|                                                                                                                                  | Hg(1)-O(5)#1  | 2.370(7) | 0.304        | 1.835 |
|                                                                                                                                  | Hg(1)-O(5)    | 2.505(7) | 0.211        |       |
|                                                                                                                                  | Hg(1)-O(6)    | 2.721(8) | 0.118        |       |
|                                                                                                                                  | Hg(1)-O(9)    | 2.152(7) | 0.549        |       |
|                                                                                                                                  | Hg(1)-O(10)   | 2.176(7) | 0.514        |       |
|                                                                                                                                  | Hg(1)-O(11)#2 | 2.660(9) | 0.139        |       |
|                                                                                                                                  | Hg(2)-O(3)#3  | 2.166(8) | 0.528        |       |
|                                                                                                                                  | Hg(2)-O(3)#4  | 2.459(8) | 0.239        | 1.749 |

|                                                                                                         |               |          |           |       |
|---------------------------------------------------------------------------------------------------------|---------------|----------|-----------|-------|
|                                                                                                         | Hg(2)-O(4)#1  | 2.294(7) | 0.374     |       |
|                                                                                                         | Hg(2)-O(5)#1  | 2.358(7) | 0.315     |       |
|                                                                                                         | Hg(2)-O(8)#4  | 2.568(8) | 0.178     |       |
|                                                                                                         | Hg(2)-O(10)#1 | 2.730(8) | 0.115     |       |
|                                                                                                         | Hg(3)-O(1)    | 2.427(8) | 0.261     | 1.791 |
|                                                                                                         | Hg(3)-O(2)    | 2.346(7) | 0.325     |       |
|                                                                                                         | Hg(3)-O(8)    | 2.283(8) | 0.385     |       |
|                                                                                                         | Hg(3)-O(10)#2 | 2.527(8) | 0.199     |       |
|                                                                                                         | Hg(3)-O(11)   | 2.290(9) | 0.378     |       |
|                                                                                                         | Hg(3)-O(12)   | 2.453(9) | 0.243     |       |
|                                                                                                         | La(1)-O(2)    | 2.457(7) | 0.463     | 3.283 |
|                                                                                                         | La(1)-O(4)#5  | 2.441(7) | 0.483     |       |
|                                                                                                         | La(1)-O(7)    | 2.549(7) | 0.361     |       |
|                                                                                                         | La(1)-O(13)#6 | 2.522(7) | 0.388     |       |
|                                                                                                         | La(1)-O(13)   | 2.572(7) | 0.339     |       |
|                                                                                                         | La(1)-O(14)   | 2.798(8) | 0.184     |       |
|                                                                                                         | La(1)-O(15)   | 2.589(8) | 0.324     |       |
|                                                                                                         | La(1)-O(16)   | 2.530(7) | 0.380     |       |
|                                                                                                         | La(1)-O(17)#6 | 2.549(7) | 0.361     | 3.145 |
|                                                                                                         | La(2)-O(6)    | 2.432(7) | 0.495     |       |
|                                                                                                         | La(2)-O(7)    | 2.653(7) | 0.273     |       |
|                                                                                                         | La(2)-O(12)   | 2.477(7) | 0.439     |       |
|                                                                                                         | La(2)-O(14)   | 2.524(7) | 0.386     |       |
|                                                                                                         | La(2)-O(16)   | 2.880(8) | 0.148     |       |
|                                                                                                         | La(2)-O(18)#7 | 2.538(7) | 0.372     |       |
|                                                                                                         | La(2)-O(19)   | 2.469(8) | 0.448     |       |
|                                                                                                         | La(2)-O(22)#7 | 2.577(7) | 0.335     |       |
|                                                                                                         | La(2)-O(22)   | 2.687(7) | 0.249     | 5.991 |
|                                                                                                         | S(1)-O(13)    | 1.515(7) | 1.343     |       |
|                                                                                                         | S(1)-O(14)    | 1.481(7) | 1.472     |       |
|                                                                                                         | S(1)-O(18)    | 1.462(7) | 1.549     |       |
|                                                                                                         | S(1)-O(21)    | 1.444(8) | 1.627     | 5.978 |
|                                                                                                         | S(2)-O(16)    | 1.497(7) | 1.410     |       |
|                                                                                                         | S(2)-O(17)    | 1.466(7) | 1.533     |       |
|                                                                                                         | S(2)-O(20)    | 1.454(8) | 1.583     |       |
|                                                                                                         | S(2)-O(22)    | 1.486(7) | 1.452     | 6.073 |
| Ag <sub>2</sub> Cd(Se <sub>2</sub> O <sub>5</sub> )(Se <sub>0.3</sub> S <sub>0.7</sub> O <sub>4</sub> ) | S(1)-O(1)     | 1.558(6) | 1.192×0.7 |       |
|                                                                                                         | S(1)-O(2)     | 1.510(7) | 1.357×0.7 |       |
|                                                                                                         | S(1)-O(3)     | 1.517(7) | 1.332×0.7 |       |
|                                                                                                         | S(1)-O(4)     | 1.522(6) | 1.321×0.7 |       |
|                                                                                                         | Se(1)-O(1)    | 1.558(6) | 1.857×0.3 |       |
|                                                                                                         | Se(1)-O(2)    | 1.510(7) | 2.114×0.3 |       |
|                                                                                                         | Se(1)-O(3)    | 1.517(7) | 2.075×0.3 |       |

|  |              |          |           |       |
|--|--------------|----------|-----------|-------|
|  | Se(1)-O(4)   | 1.522(6) | 2.058×0.3 |       |
|  | Se(2)-O(5)   | 1.805(6) | 1.016     | 3.921 |
|  | Se(2)-O(6)   | 1.665(6) | 1.480     |       |
|  | Se(2)-O(7)   | 1.680(7) | 1.425     |       |
|  | Se(3)-O(5)   | 1.841(6) | 0.922     | 4.023 |
|  | Se(3)-O(8)   | 1.663(6) | 1.492     |       |
|  | Se(3)-O(9)   | 1.636(7) | 1.609     |       |
|  | Cd(1)-O(1)   | 2.402(5) | 0.261     | 2.317 |
|  | Cd(1)-O(1)#1 | 2.299(6) | 0.345     |       |
|  | Cd(1)-O(3)#2 | 2.231(7) | 0.414     |       |
|  | Cd(1)-O(6)   | 2.302(6) | 0.341     |       |
|  | Cd(1)-O(7)#3 | 2.251(7) | 0.391     |       |
|  | Cd(1)-O(8)#4 | 2.256(5) | 0.385     |       |
|  | Ag(1)-O(4)#2 | 2.387(7) | 0.208     | 0.755 |
|  | Ag(1)-O(6)#4 | 2.605(6) | 0.115     |       |
|  | Ag(1)-O(8)   | 2.426(7) | 0.186     |       |
|  | Ag(1)-O(8)#4 | 2.752(7) | 0.077     |       |
|  | Ag(1)-O(9)#5 | 2.759(7) | 0.076     |       |
|  | Ag(1)-O(9)   | 2.683(7) | 0.093     |       |
|  | Ag(2)-O(2)#3 | 2.398(8) | 0.202     | 0.870 |
|  | Ag(2)-O(6)#1 | 2.347(7) | 0.232     |       |
|  | Ag(2)-O(7)#3 | 2.484(5) | 0.159     |       |
|  | Ag(2)-O(7)#1 | 2.833(6) | 0.062     |       |
|  | Ag(2)-O(9)#2 | 2.373(6) | 0.215     |       |

Symmetry transformations used to generate equivalent atoms:

For  $\text{Hg}_2(\text{SeO}_3)(\text{SO}_4)$ : #1  $x+1,y,z$ ; #2  $x,-y+1/2,z+1/2$ ; #3  $x-1,y,z$ ; #4  $-x+1,y+1/2,-z+3/2$ ;  
#5  $-x+1,y-1/2,-z+3/2$ ; #6  $-x+2,y+1/2,-z+3/2$ ; #7  $x+1,-y+1/2,z+1/2$

For  $\text{La}_2\text{Hg}_3(\text{SeO}_3)_4(\text{SO}_4)_2(\text{H}_2\text{O})_2$ : #1  $-x+1,-y+1,-z+1$ ; #2  $-x+2,-y+1,-z+1$ ; #3  $x-1,y,z$ ;  
#4  $-x+2,-y,-z+1$ ; #5  $x+1,y-1,z$ ; #6  $-x+3,-y,-z$ ; #7  $-x+2,-y+1,-z$

For  $\text{Ag}_2\text{Cd}(\text{Se}_2\text{O}_5)(\text{Se}_{0.3}\text{S}_{0.7}\text{O}_4)$ : #1  $-x,-y+1,-z+1$ ; #2  $-x+1,-y+1,-z+1$ ; #3  $x,y+1,z$ ;  
#4  $-x+1,-y+1,-z+2$ ; #5  $-x+2,-y+1,-z+2$

**Table S2.** State energies (eV) of the lowest conduction band (L-CB) and the highest valence band (H-VB) of the three compounds.

| Compound                                                                               | k-point                  | L-CB     | H-VB     |
|----------------------------------------------------------------------------------------|--------------------------|----------|----------|
| $\text{Hg}_2(\text{SeO}_3)(\text{SO}_4)$                                               | Z (0.000, 0.000, 0.500)  | 2.248452 | -0.12755 |
|                                                                                        | G (0.000, 0.000, 0.000)  | 1.831251 | -0.00034 |
|                                                                                        | Y (0.000, 0.500, 0.000)  | 2.281541 | -0.1403  |
|                                                                                        | A (-0.500, 0.500, 0.000) | 2.94249  | -0.01032 |
|                                                                                        | B (-0.500, 0.000, 0.000) | 2.774263 | -0.01292 |
|                                                                                        | D (-0.500, 0.000, 0.500) | 3.022949 | -0.1993  |
|                                                                                        | E (-0.500, 0.500, 0.500) | 3.165734 | -0.07818 |
|                                                                                        | C (0.000, 0.500, 0.500)  | 2.527822 | -0.15376 |
| $\text{La}_2\text{Hg}_3(\text{SeO}_3)_4(\text{SO}_4)_2(\text{H}_2\text{O})_2$          | G (0.000, 0.000, 0.000)  | 2.998581 | -0.03766 |
|                                                                                        | F (0.000, 0.500, 0.000)  | 3.115381 | 0        |
|                                                                                        | Q (0.000, 0.500, 0.500)  | 3.114743 | -0.01074 |
|                                                                                        | Z (0.000, 0.000, 0.500)  | 2.994337 | -0.04353 |
|                                                                                        | G (0.000, 0.000, 0.000)  | 2.998581 | -0.03766 |
| $\text{Ag}_2\text{Cd}(\text{Se}_2\text{O}_5)(\text{Se}_{0.3}\text{S}_{0.7}\text{O}_4)$ | G (0.000, 0.000, 0.000)  | 2.992551 | -0.1249  |
|                                                                                        | F (0.000, 0.500, 0.000)  | 3.012731 | -0.03566 |
|                                                                                        | Q (0.000, 0.500, 0.500)  | 3.271196 | 0        |
|                                                                                        | Z (0.000, 0.000, 0.500)  | 3.222415 | -0.08449 |
|                                                                                        | G (0.000, 0.000, 0.000)  | 2.992551 | -0.1249  |

## Computational Method

Single-crystal structural data of compounds  $\text{Hg}_2(\text{SeO}_3)(\text{SO}_4)$ ,  $\text{La}_2\text{Hg}_3(\text{SeO}_3)_4(\text{SO}_4)_2(\text{H}_2\text{O})_2$  and  $\text{Ag}_2\text{Cd}(\text{Se}_2\text{O}_5)(\text{Se}_{0.3}\text{S}_{0.7}\text{O}_4)$  were used for the theoretical calculations. The electronic structures were performed using a plane-wave basis set and pseudo-potentials within density functional theory (DFT) implemented in the total-energy code CASTEP [1]. For the exchange and correlation functional, we chose Perdew–Burke–Ernzerhof (PBE) in the generalized gradient approximation (GGA) [2]. The interactions between the ionic cores and the electrons were described by the ultrasoft pseudopotential [3]. The following valence-electron configurations were considered in the computation: La-5d<sup>1</sup>6s<sup>2</sup>, Ag-4d<sup>10</sup>4p<sup>6</sup>5s<sup>1</sup>, Cd-4d<sup>10</sup>4p<sup>2</sup>5s<sup>2</sup>, Hg-5d<sup>10</sup>5p<sup>2</sup>6s<sup>2</sup>, Se-4s<sup>2</sup>4p<sup>4</sup>, O-2s<sup>2</sup>2p<sup>4</sup>, S-3s<sup>2</sup>3p<sup>4</sup> and H-1s<sup>1</sup>. The numbers of plane waves included in the basis sets were determined by cutoff energy of 750 eV, 750 eV and 765 eV for  $\text{Hg}_2(\text{SeO}_3)(\text{SO}_4)$ ,  $\text{La}_2\text{Hg}_3(\text{SeO}_3)_4(\text{SO}_4)_2(\text{H}_2\text{O})_2$  and  $\text{Ag}_2\text{Cd}(\text{Se}_2\text{O}_5)(\text{Se}_{0.3}\text{S}_{0.7}\text{O}_4)$  respectively. The numerical integration of the Brillouin zone was performed using Monkhorst-Pack k-point sampling of  $4 \times 4 \times 2$ ,  $3 \times 3 \times 2$  and  $4 \times 4 \times 3$  for  $\text{Hg}_2(\text{SeO}_3)(\text{SO}_4)$ ,  $\text{La}_2\text{Hg}_3(\text{SeO}_3)_4(\text{SO}_4)_2(\text{H}_2\text{O})_2$  and  $\text{Ag}_2\text{Cd}(\text{Se}_2\text{O}_5)(\text{Se}_{0.3}\text{S}_{0.7}\text{O}_4)$  respectively. The other parameters and convergent criteria were the default values of CASTEP code.

The calculations of linear optical properties in terms of the complex dielectric function  $\varepsilon(\omega) = \varepsilon_1(\omega) + i\varepsilon_2(\omega)$  were made. The imaginary part of the dielectric function  $\varepsilon_2$  was given in the following equation:

$$\varepsilon_2^{ij}(\omega) = \frac{8\pi^2\hbar^2e^2}{(m^2V)} \sum_k \sum_{cv} (f_c - f_v) \frac{p_{cv}^i(k)p_{cv}^j(k)}{E_{vc}^2} \delta [E_c(k) - E_v(k) - \hbar\omega]$$

The  $f_c$  and  $f_v$  represent the Fermi distribution functions of the conduction and valence band. The term  $p_{cv}^i(k)$  denotes the momentum matrix element transition from the energy level  $c$  of the conduction band to the level  $v$  of the valence band at the  $k$ th point in the Brillouin zone (BZ), and  $V$  is the volume of the unit cell.

The real part  $\varepsilon_1(\omega)$  of the dielectric function  $\varepsilon(\omega)$  follows from the Kramer–Kronig relationship. All the other optical constants may be derived from  $\varepsilon_1(\omega)$  and  $\varepsilon_2(\omega)$ . For

example, the refractive index  $n(\omega)$  can be calculated using the following expression[4]:

$$n(\omega) = \frac{1}{\sqrt{2}} \left[ \sqrt{\varepsilon_1^2(\omega) + \varepsilon_2^2(\omega)} + \varepsilon_1(\omega) \right]^{1/2}$$

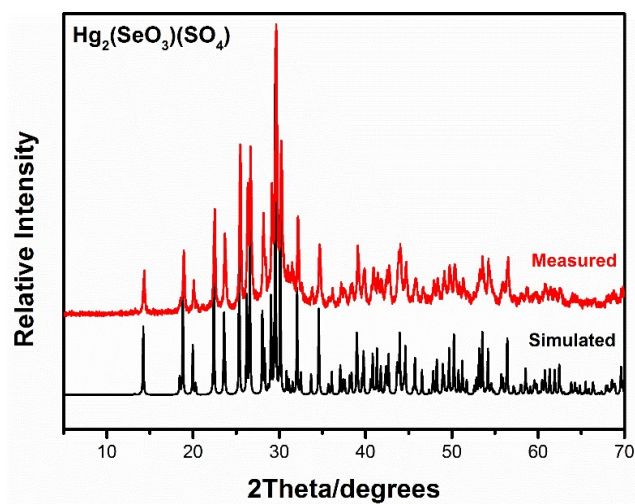

(a)

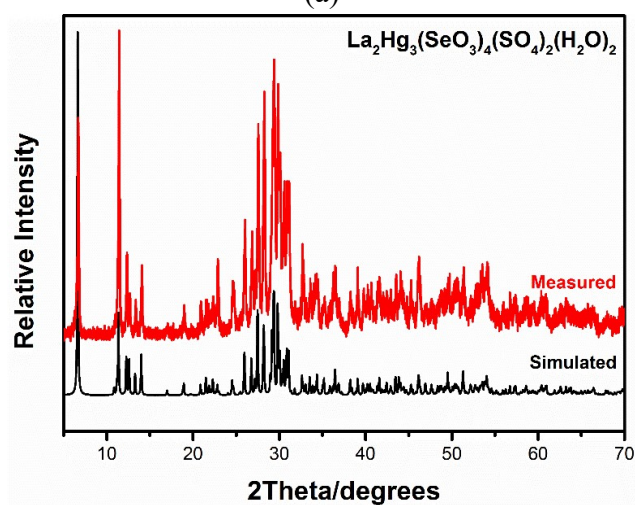

(b)

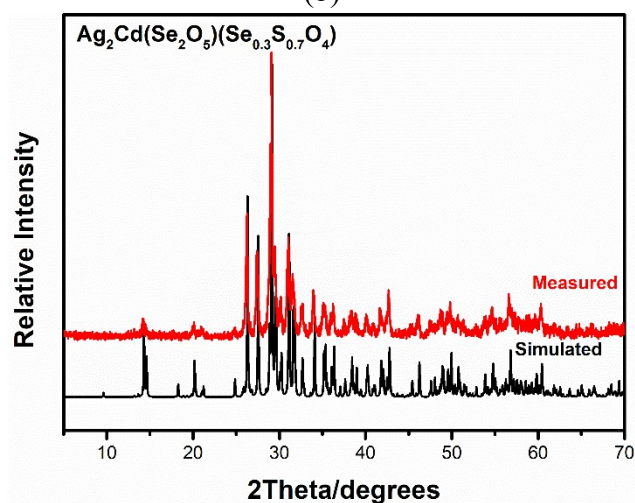

(c)

**Figure S1.** Simulated and experimental powder X-ray diffractometer patterns of  $\text{Hg}_2(\text{SeO}_3)(\text{SO}_4)$  (a),  $\text{La}_2\text{Hg}_3(\text{SeO}_3)_4(\text{SO}_4)_2(\text{H}_2\text{O})_2$  (b) and  $\text{Ag}_2\text{Cd}(\text{Se}_2\text{O}_5)(\text{Se}_{0.3}\text{S}_{0.7}\text{O}_4)$  (c).



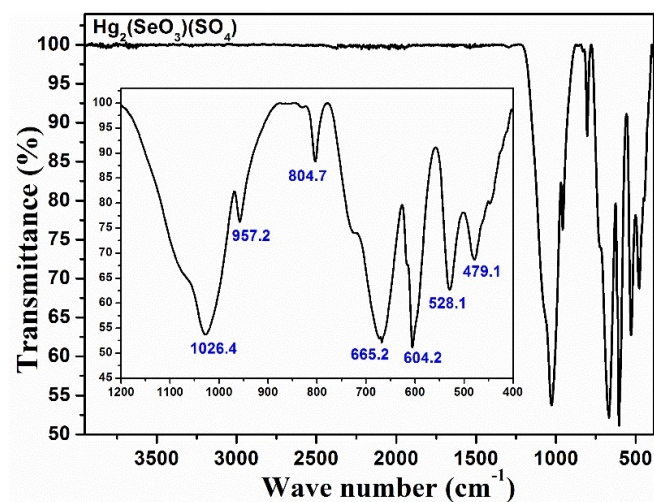

(a)

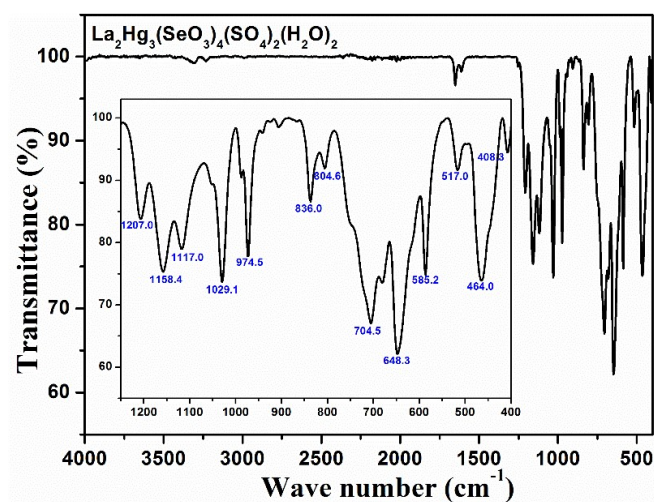

(b)

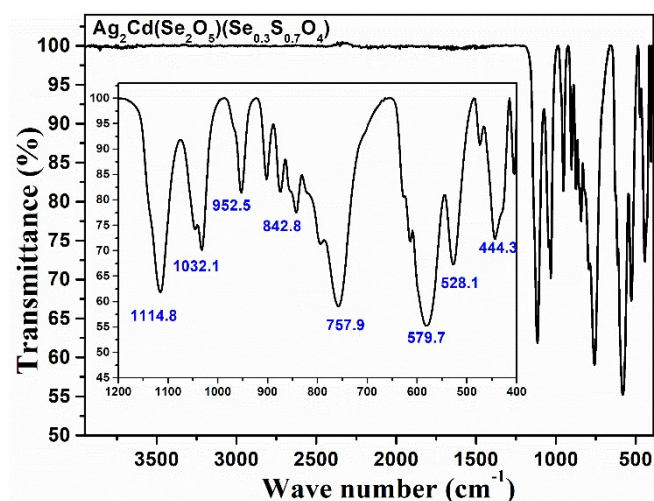

(c)

**Figure S2.** IR spectra of Hg<sub>2</sub>(SeO<sub>3</sub>)(SO<sub>4</sub>) (a), La<sub>2</sub>Hg<sub>3</sub>(SeO<sub>3</sub>)<sub>4</sub>(SO<sub>4</sub>)<sub>2</sub>(H<sub>2</sub>O)<sub>2</sub> (b) and Ag<sub>2</sub>Cd(Se<sub>2</sub>O<sub>5</sub>)(Se<sub>0.3</sub>S<sub>0.7</sub>O<sub>4</sub>) (c).

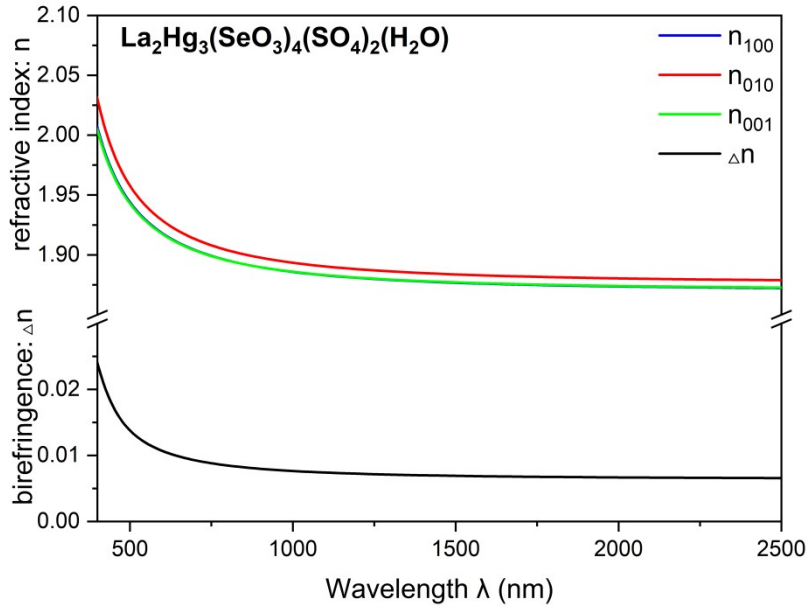

(a)

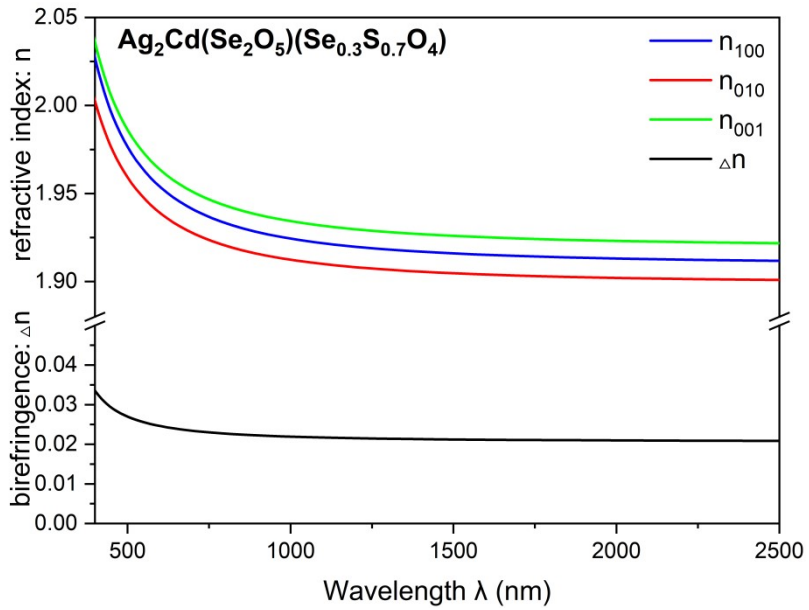

(b)

**Figure S3.** Calculated refractive indices and birefringence of  $\text{La}_2\text{Hg}_3(\text{SeO}_3)_4(\text{SO}_4)_2(\text{H}_2\text{O})_2$  (a) and  $\text{Ag}_2\text{Cd}(\text{Se}_2\text{O}_5)(\text{Se}_{0.3}\text{S}_{0.7}\text{O}_4)$  (b).

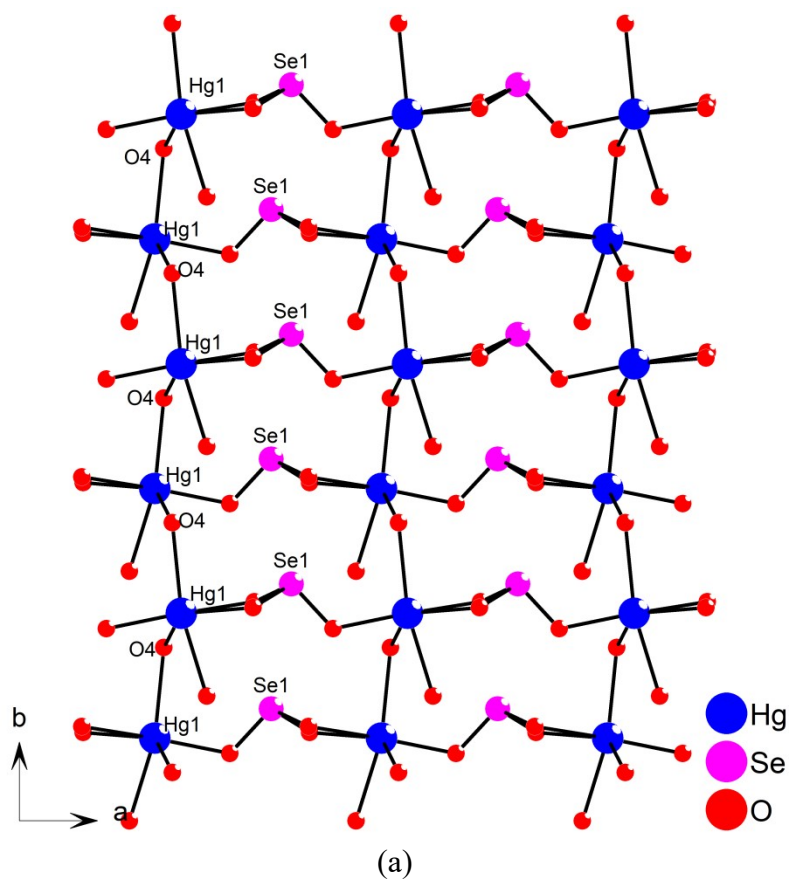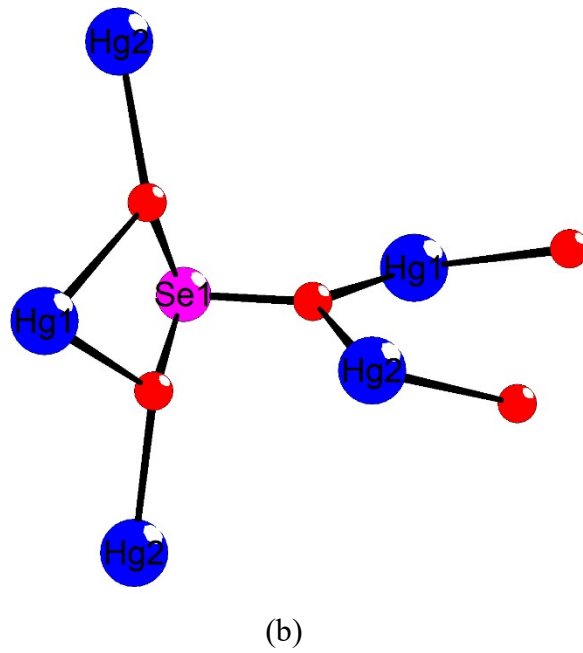

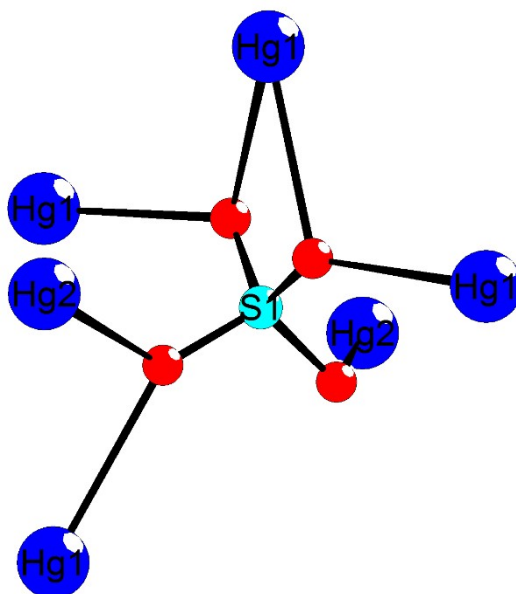

(c)

**Figure S4.** 2D mercuric selenite layer (a), coordination environment of Se(1)O<sub>3</sub> group (b) and coordination environment of SO<sub>4</sub> (c) in Hg<sub>2</sub>(SeO<sub>3</sub>)(SO<sub>4</sub>).

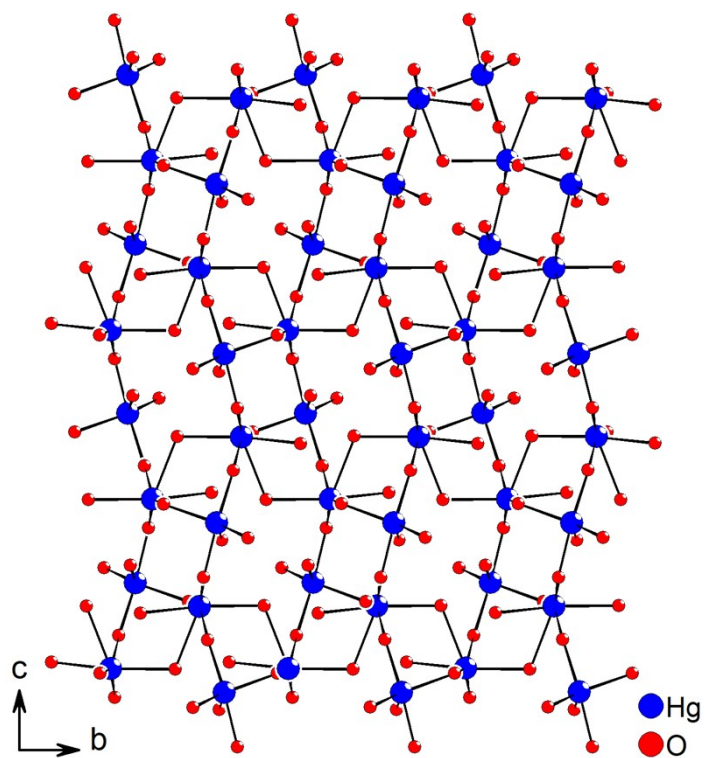

**Figure S5.** 2D mercury oxide layer of Hg<sub>2</sub>(SeO<sub>3</sub>)(SO<sub>4</sub>).

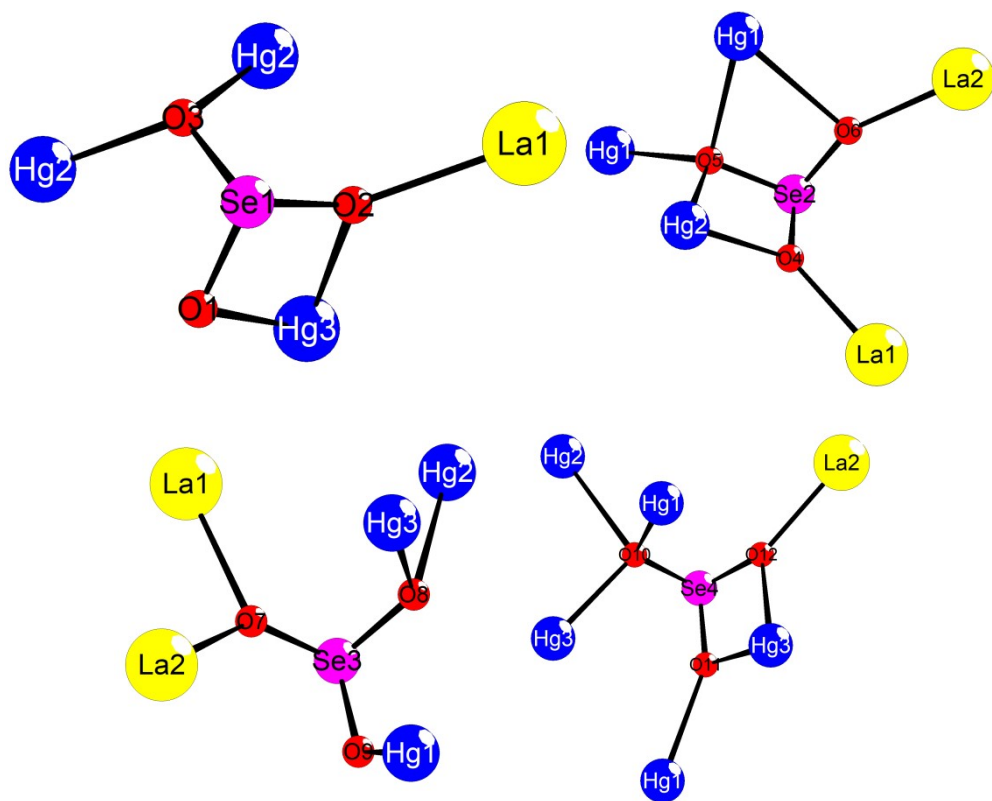

(a)

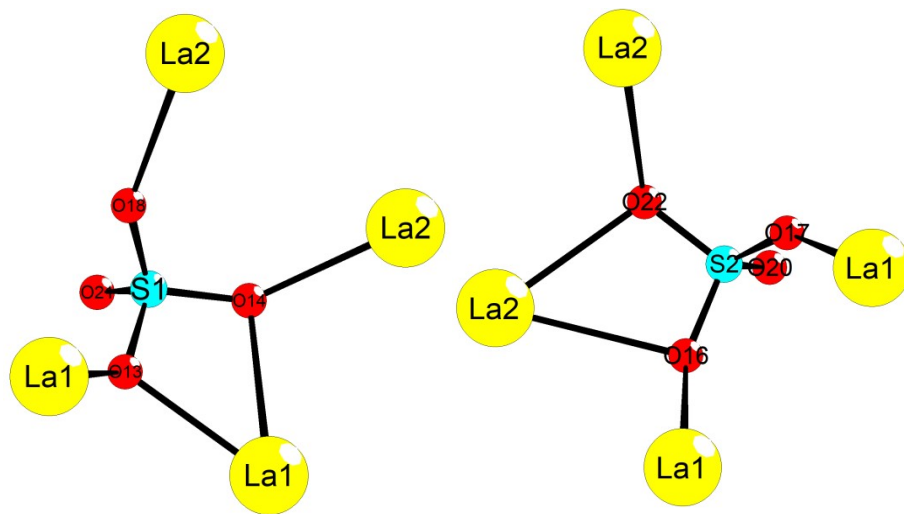

(b)

**Figure S6.** The coordination environment of  $\text{SeO}_3$  group (a) and  $\text{SO}_4$  tetrahedrons (b) in  $\text{La}_2\text{Hg}_3(\text{SeO}_3)_4(\text{SO}_4)_2(\text{H}_2\text{O})_2$ .

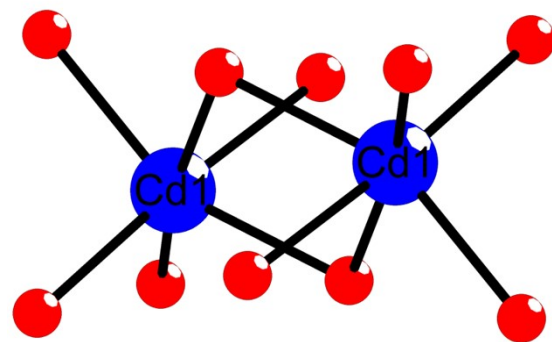

(a)

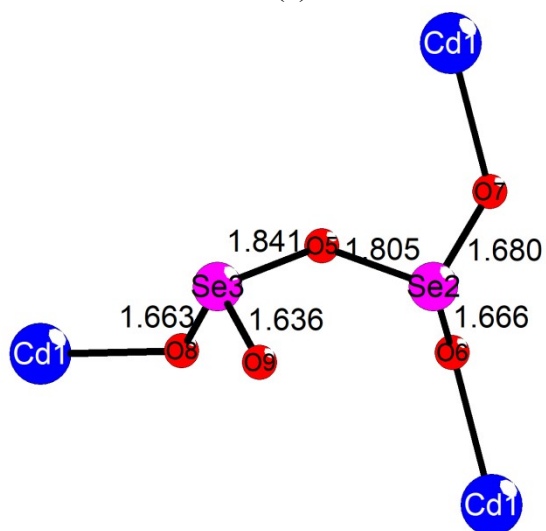

(b)

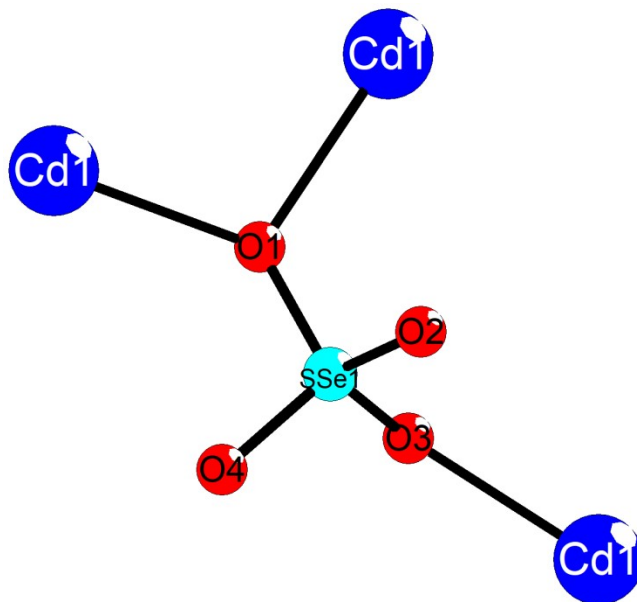

(c)

**Figure S7.** The  $[\text{Cd}_2\text{O}_{10}]$  dimers (a), coordination environment of  $\text{Se}_2\text{O}_5$  group (b) and coordination environment of  $\text{SSeO}_4$  (c) in  $\text{Ag}_2\text{Cd}(\text{Se}_2\text{O}_5)(\text{Se}_{0.3}\text{S}_{0.7}\text{O}_4)$ .

## References

- [1] M. D. Segall, P. J. D. Lindan, M. J. Probert, C. J. Pickard, P. J. Hasnip, S. J. Clark and M. C. J. Payne, First-principles simulation: ideas, illustrations and the CASTEP code, *Phys-Condens Mat.*, 2002, **14**, 2717.
- [2] V. Milman, B. Winkler, J. A. White, C. J. Pickard, M. C. Payne, E. V. Akhmatkaya and R. H. Nobes, Electronic structure, properties, and phase stability of inorganic crystals: A pseudopotential plane-wave study, *Int. J. Quantum. Chem.*, 2000, **77**, 895-910.
- [3] J. P. Perdew, K. Burke and M. Ernzerhof, Generalized Gradient Approximation Made Simple, *Phys. Rev. Lett.*, 1996, **77**, 3865.
- [4] D. Vanderbilt, Soft self-consistent pseudopotentials in a generalized eigenvalue formalism, *Phys Rev B Condens Matter*. 1990, **41**, 7892-7895.
